# Supplementary material
Source: bioRxiv or medRxiv preprint supplement (https://www.biorxiv.org/highwire/filestream/10023/field_highwire_adjunct_files/2/037218-3.pdf)

# S3 Figure

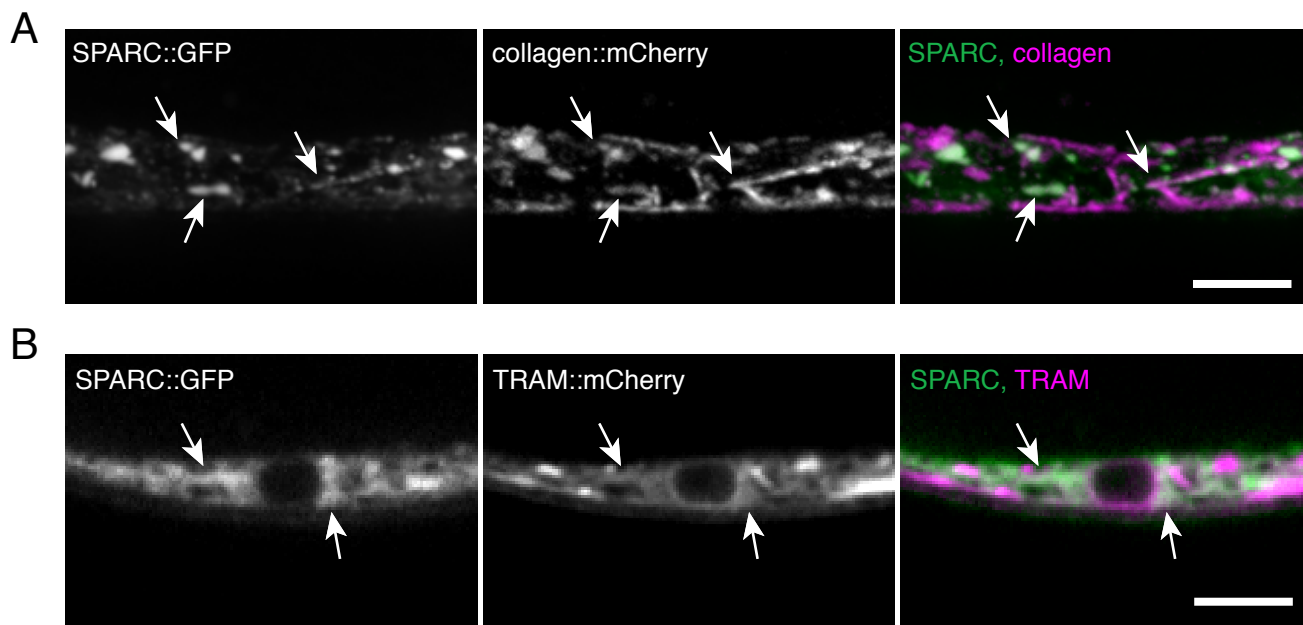

Supplement: Supplementary file [file 037218-3.pdf]
